# Supplementary material for: Lupin (Lupinus spp.) seeds exert anthelmintic activity associated with their alkaloid content
Source: PubMed Central journal article supplement (PMC6588613; doi:10.1038/s41598-019-45654-6), 2019-06-21
Supplement: 41598_2019_45654_MOESM1_ESM.pdf [file 41598_2019_45654_MOESM1_ESM.pdf]

# **Lupin (*Lupinus spp.*) seeds exert anthelmintic activity associated with their alkaloid content**

Dubois O.<sup>1,2,‡</sup>, Allanic C.<sup>1,‡</sup>, Charvet C. L.<sup>1</sup>, Guégnard F.<sup>1</sup>, Février H.<sup>1</sup>, Théry-Koné I.<sup>2</sup>, Cortet J.<sup>1</sup>, Koch C.<sup>1</sup>, Bouvier F.<sup>3</sup>, Fassier T.<sup>3</sup>, Marcon D.<sup>3</sup>, Magnin-Robert J.B.<sup>4</sup>, Peineau N.<sup>5</sup>, Courtot E.<sup>1</sup>, Huau C.<sup>6</sup>, Meynadier A.<sup>6</sup>, Enguehard-Gueiffier C.<sup>2</sup>, Neveu C.<sup>1</sup>, Boudesocque-Delaye L.<sup>2,†</sup>, Sallé G.<sup>1, †,\*</sup>

<sup>1</sup>, UMR1282 Infectiologie et Santé Publique, INRA, Université de Tours, F-37380 Nouzilly, France

<sup>2</sup>, EA 7502 SIMBA, Université de Tours, Faculté de Pharmacie, F-37000 Tours, France

<sup>3</sup>, UE332 La Sapinière, INRA, F-18174 Osmoy, France

<sup>4</sup>, Agroécologie, AgroSup Dijon, INRA, Univ. Bourgogne, Univ. Bourgogne Franche-Comté, F-21000 Dijon, France

<sup>5</sup>, Département Physiologie Animale, Université de Tours, Faculté des Sciences et Techniques, F-37000 Tours, France

<sup>6</sup>, GenPhySE, INRA, Université de Toulouse, INPT, ENVT, F-31326, Castanet-Tolosan, France

†, both authors contributed equally to this work

‡, both authors contributed equally to this work

\* corresponding author

Guillaume Sallé

[Guillaume.Salle@inra.fr](mailto:Guillaume.Salle@inra.fr)

## Supplementary information

### Table of Contents

|                                                                                                                                                                                                                                                     |    |
|-----------------------------------------------------------------------------------------------------------------------------------------------------------------------------------------------------------------------------------------------------|----|
| <i>Supplementary Table 1. Description of the 11 lupin varieties considered in the initial screening for nematicide effect</i> .....                                                                                                                 | 3  |
| <i>Supplementary Table 2. Measured inhibitory effect of 11 lupin variety extracts on Haemonchus contortus infective larvae</i> .....                                                                                                                | 4  |
| <i>Supplementary Table 3. Measured inhibitory effect of the alkaloidic fractions recovered from alkaloidic-rich varieties on Haemonchus contortus infective larvae</i> .....                                                                        | 5  |
| <i>Supplementary Table 4. Compared inhibitory potentials of alkaloidic and non-alkaloidic fractions extracted from the ENERGY and E063 varieties against drug susceptible and -resistant H.contortus and drug-susceptible T. circumcincta</i> ..... | 6  |
| <i>Supplementary table 5. Lupanine base content of ENERGY and E063 alkaloid fractions quantified by UHPLC</i> .....                                                                                                                                 | 6  |
| <i>Supplementary Table 6. Median inhibitory concentrations (IC<sub>50</sub>) estimated for ENERGY and E063 alkaloid fractions on H.contortus infective larvae</i> .....                                                                             | 7  |
| <i>Supplementary Table 7. Average migration of H. contortus larvae after exposure to ENERGY CPC-fractionated alkaloidic extracts</i> .....                                                                                                          | 7  |
| <i>Supplementary Table 8. Estimated median excitatory concentrations (EC<sub>50</sub>) for acetylcholine in absence or presence of lupanine and inhibitory concentrations (IC<sub>50</sub>) of lupanine on nematode cholinergic receptors</i> ..... | 8  |
| <i>Supplementary Table 9. Average production traits and dispersion for considered experimental groups at the start of the experiment</i> .....                                                                                                      | 8  |
| <i>Supplementary Table 10. Diet compositions for considered experimental groups</i> .....                                                                                                                                                           | 9  |
| <i>Supplementary Table 11. Prepatent period length and larval development rate measured in infected sheep and goats</i> .....                                                                                                                       | 9  |
| <i>Figure S1. Concentration-response curves for lupanine and levamisole obtained from larval migration inhibition assay on susceptible H.contortus infective larvae</i> .....                                                                       | 10 |
| <i>Figure S2: Alkaloid extraction and identification scheme for the energy lupin variety</i> .....                                                                                                                                                  | 11 |
| <i>Figure S3. HPLC Chromatogram of active alkaloids fractions obtained after CPC fractionation</i> ..                                                                                                                                               | 12 |
| <i>Figure S4. Inhibitory effect of lupanine on recombinant acetylcholine receptors</i> .....                                                                                                                                                        | 13 |

**Supplementary Table 1. Description of the 11 lupin varieties considered in the initial screening for nematicide effect**

| <b>Species</b>          | <b>Variety</b> | <b>Origin</b> | <b>Alkaloid content</b> |
|-------------------------|----------------|---------------|-------------------------|
| <i>L. albus</i>         | E063           | Spain         | High                    |
| <i>L. albus</i>         | EGY014         | Egypt         | High                    |
| <i>L. albus</i>         | EGY100         | Egypt         | High                    |
| <i>L. angustifolius</i> | LANG061        | France        | High                    |
| <i>L. luteus</i>        | LL151          | Portugal      | High                    |
| <i>L. mutabilis</i>     | LM261          | Peru          | High                    |
| <i>L. albus</i>         | CLOVIS*        | France        | Low                     |
| <i>L. albus</i>         | ENERGY*        | France        | Low                     |
| <i>L. albus</i>         | ORUS*          | France        | Low                     |
| <i>L. angustifolius</i> | LANG172        | Australia     | Low                     |
| <i>L. luteus</i>        | LL049          | Germany       | Low                     |

\*, commercially available varieties in Europe

**Supplementary Table 2. Measured inhibitory effect of 11 lupin variety extracts on *Haemonchus contortus* infective larvae**

| Lupin variety | Alkaloid content | <i>H. contortus</i> resistance status | Average inhibitory effect | Standard deviation |
|---------------|------------------|---------------------------------------|---------------------------|--------------------|
| CLOVIS        | Low              | Multidrug resistant                   | 61.97%                    | 5.59%              |
| Control       | Low              | Multidrug resistant                   | 5.28%                     | 6.14%              |
| E063          | High             | Multidrug resistant                   | 78.10%                    | 10.03%             |
| EGY014        | High             | Multidrug resistant                   | 84.67%                    | 3.79%              |
| EGY100        | High             | Multidrug resistant                   | 81.75%                    | 3.34%              |
| ENERGY        | Low              | Multidrug resistant                   | 75.35%                    | 4.88%              |
| LANG061       | High             | Multidrug resistant                   | 70.80%                    | 12.83%             |
| LANG172       | Low              | Multidrug resistant                   | 59.86%                    | 11.76%             |
| LL049         | Low              | Multidrug resistant                   | 73.24%                    | 5.32%              |
| LL151         | High             | Multidrug resistant                   | 63.50%                    | 22.37%             |
| LM261         | High             | Multidrug resistant                   | 83.94%                    | 9.12%              |
| ORUS          | Low              | Multidrug resistant                   | 58.45%                    | 5.32%              |
| CLOVIS        | Low              | Fully susceptible                     | 33.94%                    | 12.00%             |
| Control       | Low              | Fully susceptible                     | 2.52%                     | 4.18%              |
| E063          | High             | Fully susceptible                     | 53.15%                    | 9.96%              |
| EGY014        | High             | Fully susceptible                     | 95.95%                    | 2.70%              |
| EGY100        | High             | Fully susceptible                     | 66.22%                    | 4.68%              |
| ENERGY        | Low              | Fully susceptible                     | 40.37%                    | 5.73%              |
| LANG061       | High             | Fully susceptible                     | 69.37%                    | 6.80%              |
| LANG172       | Low              | Fully susceptible                     | 8.41%                     | 9.56%              |
| LL049         | Low              | Fully susceptible                     | 45.41%                    | 3.18%              |
| LL151         | High             | Fully susceptible                     | 50.90%                    | 12.26%             |
| LM261         | High             | Fully susceptible                     | 92.79%                    | 0.78%              |
| ORUS          | Low              | Fully susceptible                     | 27.98%                    | 7.83%              |

**Supplementary Table 3. Measured inhibitory effect of the alkaloidic fractions recovered from alkaloidic-rich varieties on *Haemonchus contortus* infective larvae**

| <b>Lupin variety</b> | <b><i>H. contortus</i> resistance status</b> | <b>Average inhibitory effect</b> | <b>Standard deviation</b> |
|----------------------|----------------------------------------------|----------------------------------|---------------------------|
| Water control        | Multidrug resistant                          | 0.00%                            | 12.90%                    |
| E063                 | Multidrug resistant                          | 81.99%                           | 3.58%                     |
| EGY014               | Multidrug resistant                          | 72.99%                           | 8.65%                     |
| EGY100               | Multidrug resistant                          | 73.46%                           | 8.33%                     |
| LANG061              | Multidrug resistant                          | 69.67%                           | 5.75%                     |
| LL151                | Multidrug resistant                          | 59.24%                           | 10.67%                    |
| LM261                | Multidrug resistant                          | 78.20%                           | 6.41%                     |
| Water control        | Fully susceptible                            | 0.00%                            | 10.77%                    |
| E063                 | Fully susceptible                            | 77.59%                           | 3.95%                     |
| EGY014               | Fully susceptible                            | 61.49%                           | 7.53%                     |
| EGY100               | Fully susceptible                            | 73.28%                           | 3.95%                     |
| LANG061              | Fully susceptible                            | 54.31%                           | 9.00%                     |
| LL151                | Fully susceptible                            | 52.01%                           | 2.77%                     |
| LM261                | Fully susceptible                            | 56.03%                           | 2.28%                     |

**Supplementary Table 4. Compared inhibitory potentials of alkaloidic and non-alkaloidic fractions extracted from the ENERGY and E063 varieties against drug susceptible and -resistant *H. contortus* and drug-susceptible *T. circumcincta***

|                      | <i>H. contortus</i> - Drug susceptible |        | <i>H. contortus</i> - Multidrug resistant |        | <i>T. teladorsagia</i> - Susceptible |        |
|----------------------|----------------------------------------|--------|-------------------------------------------|--------|--------------------------------------|--------|
|                      | Average                                | Std.   | Average                                   | Std.   | mean                                 | Std.   |
| Water                | 0.17%                                  | 5.42%  | -0.17%                                    | 8.42%  | 0.00%                                | 13.49% |
| Levamisole           | 99.50%                                 | 1.22%  | 30.50%                                    | 6.38%  | 73.70%                               | 6.68%  |
| E063-Total Extract   | 83.00%                                 | 4.90%  | 28.33%                                    | 7.28%  | 98.00%                               | 2.68%  |
| E063.Alkaloids       | 41.17%                                 | 13.53% | 40.17%                                    | 9.06%  | 51.00%                               | 9.14%  |
| E063.Non-alkaloids   | 37.67%                                 | 7.79%  | 12.50%                                    | 6.41%  | 21.70%                               | 8.19%  |
| ENERGY-Total Extract | 42.67%                                 | 8.24%  | 48.67%                                    | 15.55% | 90.20%                               | 8.95%  |
| ENERGY.Alkaloids     | 41.50%                                 | 16.56% | 54.83%                                    | 9.06%  | 72.30%                               | 9.79%  |
| ENERGY.Non-alkaloids | -12.33%                                | 15.63% | -10.00%                                   | 20.34% | 6.00%                                | 18.81% |

Average inhibitory effect and corresponding standard deviations are presented for each every tested condition across *H. contortus* isolates and a susceptible *T. circumcincta* isolate. Each condition was run in triplicate. Levamisole was used at 10  $\mu$ M and lyophilized extracts were used at a concentration of 5mg/mL.

**Supplementary table 5. Lupanine base content of ENERGY and E063 alkaloid fractions quantified by UHPLC**

| Lupin variety | Lupanine base ( $\mu$ g) | Extract injected ( $\mu$ g) | Percentage of Lupanine base (%) |
|---------------|--------------------------|-----------------------------|---------------------------------|
| ENERGY        | 2.15 $\pm$ 0.02          | 10                          | 21.5 $\pm$ 0.2                  |
| E063          | 2.97 $\pm$ 0.01          | 6                           | 49.5 $\pm$ 0.2                  |

**Supplementary Table 6. Median inhibitory concentrations (IC<sub>50</sub>) estimated for ENERGY and E063 alkaloid fractions on *H. contortus* infective larvae**

|                                         |        | IC <sub>50</sub> | Std. | Lower bound | Upper bound |
|-----------------------------------------|--------|------------------|------|-------------|-------------|
| Multidrug resistant <i>H. contortus</i> | E063   | 8.38             | 1.15 | 6.05        | 10.72       |
|                                         | ENERGY | 5.59             | 0.47 | 4.64        | 6.55        |
| Fully susceptible <i>H. contortus</i>   | E063   | 9.30             | 0.73 | 7.82        | 10.78       |
|                                         | ENERGY | 4.54             | 0.21 | 4.11        | 4.96        |

IC<sub>50</sub> was estimated from a log-logistic regression. *Std* indicates estimated standard deviation, and lower and upper bound of the 95% confidence interval are provided.

**Supplementary Table 7. Average migration of *H. contortus* larvae after exposure to ENERGY CPC-fractionated alkaloidic extracts**

| Isolate             | Fraction               | Percentage of migrating larvae | Standard deviation |
|---------------------|------------------------|--------------------------------|--------------------|
| Multidrug-resistant | Crude alkaloid extract | 43.8                           | 11.7               |
|                     | F1                     | 91.7                           | 17.4               |
|                     | F2                     | 0.8                            | 1.4                |
|                     | F3                     | 2.5                            | 2.5                |
|                     | F4                     | 120.7                          | 24.5               |
|                     | F5                     | 58.7                           | 5.2                |
|                     | F6                     | 58.7                           | 20.2               |
|                     | F7                     | 38.8                           | 5.2                |
|                     | F8                     | 14.9                           | 5.0                |
|                     | F9                     | 22.3                           | 5.0                |
|                     | F10                    | 6.6                            | 3.8                |
|                     | Levamisole (10 μM)     | 39.7                           | 8.9                |
|                     | Negative control       | 100.0                          | 19.9               |
| Fully susceptible   | Crude alkaloid extract | 49.3                           | 2.1                |
|                     | F1                     | 91.4                           | 24.7               |
|                     | F2                     | 15.0                           | 2.1                |
|                     | F3                     | 5.7                            | 4.5                |
|                     | F4                     | 90.0                           | 9.3                |
|                     | F5                     | 80.0                           | 24.4               |
|                     | F6                     | 74.3                           | 5.0                |
|                     | F7                     | 33.6                           | 6.2                |
|                     | F8                     | 17.9                           | 2.5                |
|                     | F9                     | 15.7                           | 1.2                |
|                     | F10                    | 6.4                            | 3.7                |
|                     | Levamisole (10 μM)     | 12.1                           | 5.4                |
|                     | Negative control       | 100.0                          | 12.6               |

Results of a Larval Migration Inhibition Assay are provided for ten fractions obtained after CPC-fractionation of ENERGY alkaloidic extracts and corresponding crude extract. Percentages and standard deviations were estimated from three replicates. Water was used a negative control. Fractions were tested at a concentration of 2.5 mg/mL, but fractions 1 and 8 (0.625 mg/mL).

**Supplementary Table 8. Estimated median excitatory concentrations (EC<sub>50</sub>) for acetylcholine in absence or presence of lupanine and inhibitory concentrations (IC<sub>50</sub>) of lupanine on nematode cholinergic receptors**

|                                             | Cel-N-AChR | Cel-L-AChR  | Hco-L-AChR-1 |
|---------------------------------------------|------------|-------------|--------------|
| <i>Acetylcholine alone</i>                  |            |             |              |
| EC <sub>50</sub> (μM)                       | 21.7 ±0.9  | 19.6 ±1.7   | 4.8 ±0.5     |
| n                                           | 12         | 11          | 10           |
| <i>Acetylcholine with Lupanine (300 μM)</i> |            |             |              |
| EC <sub>50</sub> (μM)                       | 80.6 ±27.5 | 99.1 ±47.8  | 28.6 ±8.4    |
| n                                           | 5          | 6           | 8            |
| <i>Lupanine</i>                             |            |             |              |
| IC <sub>50</sub> (μM)                       | 116.5 ±9.7 | 548.8 ±64.1 | 539.9 ±90.2  |
| n                                           | 5          | 5           | 5            |

EC<sub>50</sub> of acetylcholine and IC<sub>50</sub> of lupanine and standard deviation are reported for *Caenorhabditis elegans* nicotine- (Cel-N-AChR) and levamisole-sensitive (Cel-L-AChR) receptors, and *H. contortus* levamisole-sensitive AChRs (Hco-L-AChR-1). *n* refers to the number of *X. laevis* oocytes measured in each case.

**Supplementary Table 9. Average production traits and dispersion for considered experimental groups at the start of the experiment**

| Species | Trait                | Lup-Inf                | Lup-Ninf               | Conc-Inf               | Conc-Ninf              |
|---------|----------------------|------------------------|------------------------|------------------------|------------------------|
| Goat    | Milking rank         | 1.9 ± 1.1 [1;4]        | 2.5 ± 1.3 [1;5]        | 2.1 ± 1.0 [1;4]        | 2.3 ± 1.4 [1;6]        |
|         | Milking stage (days) | 103 ± 18 [71;129]      | 116 ± 16 [84;131]      | 102 ± 20 [68;122]      | 107 ± 20 [77;128]      |
|         | Milking volume (L)   | 1.8 ± 0.3 [1.4;2.2]    | 1.6 ± 0.5 [0.8;2.4]    | 2.1 ± 0.4 [1.5;2.6]    | 1.9 ± 0.4 [1.4;2.5]    |
| Sheep   | Age (days)           | 124 ± 2.1 [121;129]    | 125 ± 2.0 [122;129]    | 124 ± 2.3 [121;128]    | 123 ± 2.5 [120;129]    |
|         | Weight (Kg)          | 36.1 ± 4.2 [26.8;41.5] | 37.3 ± 3.1 [31.1;42.7] | 36.1 ± 3.3 [32.7;43.6] | 36.4 ± 3.3 [30.6;42.5] |

Summary statistics of ewes and goats production traits are listed for the four considered experimental groups (Lup-Inf: lupin-fed and infected; Lup-Ninf: lupin-fed and not infected; Conc-Inf: concentrate-fed and infected; Conc-Ninf: concentrate-fed and not infected). Statistics are given as “mean ± standard deviation [minimum ; maximum]” and computed from 12 individuals in each case.



**Supplementary Table 10. Diet compositions for considered experimental groups**

| Species | Group              | Ingredient             | Quantity |
|---------|--------------------|------------------------|----------|
| Sheep   | Conc-Inf/Conc-Ninf | Commercial concentrate | 0.51     |
|         |                    | Hay                    | 0.66     |
|         | Lup-Inf/Lup-Ninf   | Lupin                  | 0.25     |
|         |                    | Barley                 | 0.17     |
|         |                    | Hay                    | 0.66     |
|         |                    | Rapeseed meal          | 0.63     |
| Goat    | Conc-Inf/Conc-Ninf | Commercial concentrate | 0.22     |
|         |                    | Hay                    | 2        |
|         | Lup-Inf/Lup-Ninf   | Lupin                  | 0.45     |
|         |                    | Commercial concentrate | 0.22     |
|         |                    | Hay                    | 2        |
|         |                    |                        |          |

Ingredients quantity are given in kg of organic matter/individual/day for each dietary type in both species. Lup-Inf: lupin-fed and infected; Lup-Ninf: lupin-fed and not infected; Conc-Inf: concentrate-fed and infected; Conc-Ninf: concentrate-fed and not infected.

**Supplementary Table 11. Prepatent period length and larval development rate measured in infected sheep and goats**

| Species | Infected group | Prepatent period (days) | Larval development rate (%) |
|---------|----------------|-------------------------|-----------------------------|
| Ewe     | Lup-Inf        | 23.3 ± 2.9              | 53.3 ± 25.5                 |
|         | Conc-Inf       | 24.8 ± 4.3              | 55.2 ± 22.3                 |
| Goat    | Lup-Inf        | 24.2 ± 3.5              | 32.0 ± 15.7                 |
|         | Conc-Inf       | 25.3 ± 4.6              | 34.3 ± 21.9                 |

Prepatent period was computed as the average number of days before the onset of egg excretion within group (n = 12). Larval development rate was estimated from 6 replicates. Results are reported as “mean ± standard deviation”. Lup-Inf: lupin-fed and infected; Conc-Inf: concentrate-fed and infected.

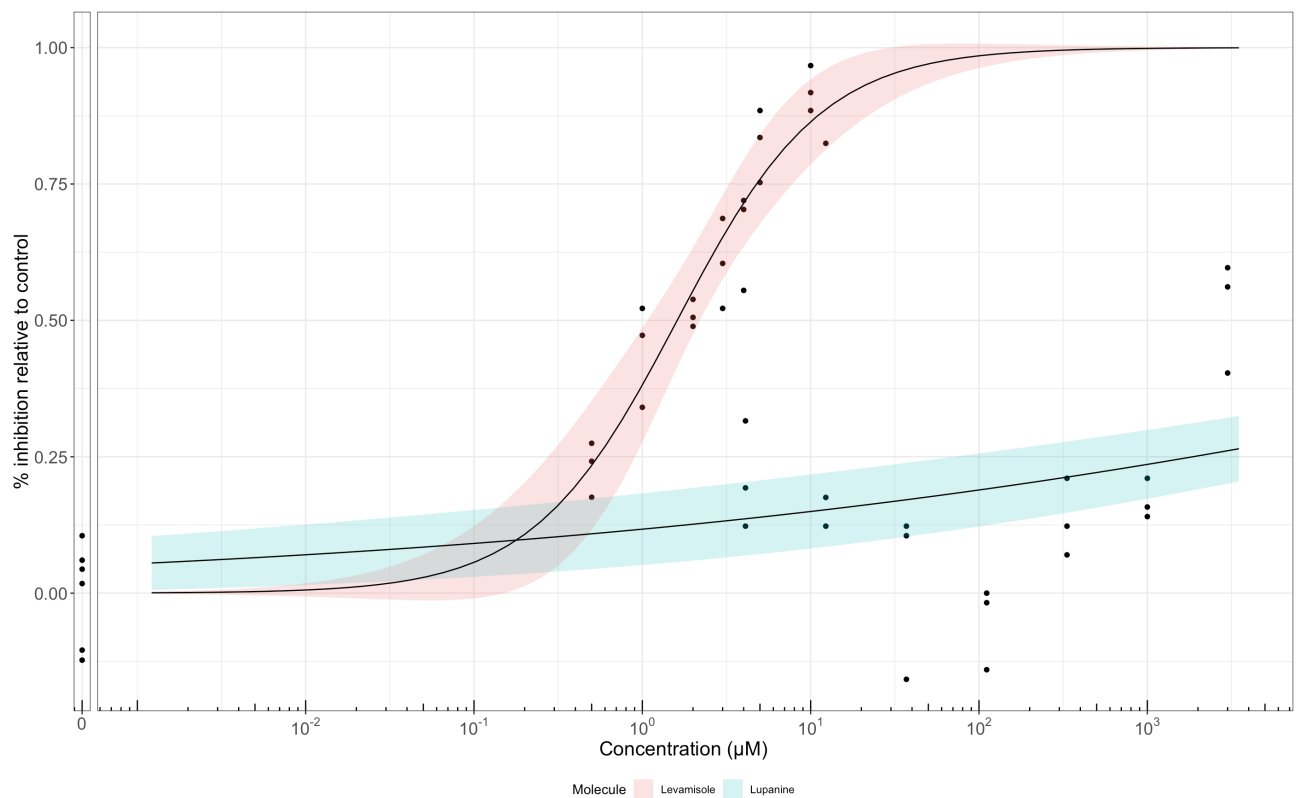

**Figure S1. Concentration-response curves for lupanine and levamisole obtained from larval migration inhibition assay on susceptible *H. contortus* infective larvae**

Plot shows the inhibited fraction of larvae relative to control for Lupanine and levamisole concentration ranging between 0 and 3 mM. Solid line stands for the fitted log-logistic regression curve and shaded area indicates 95% confidence interval.

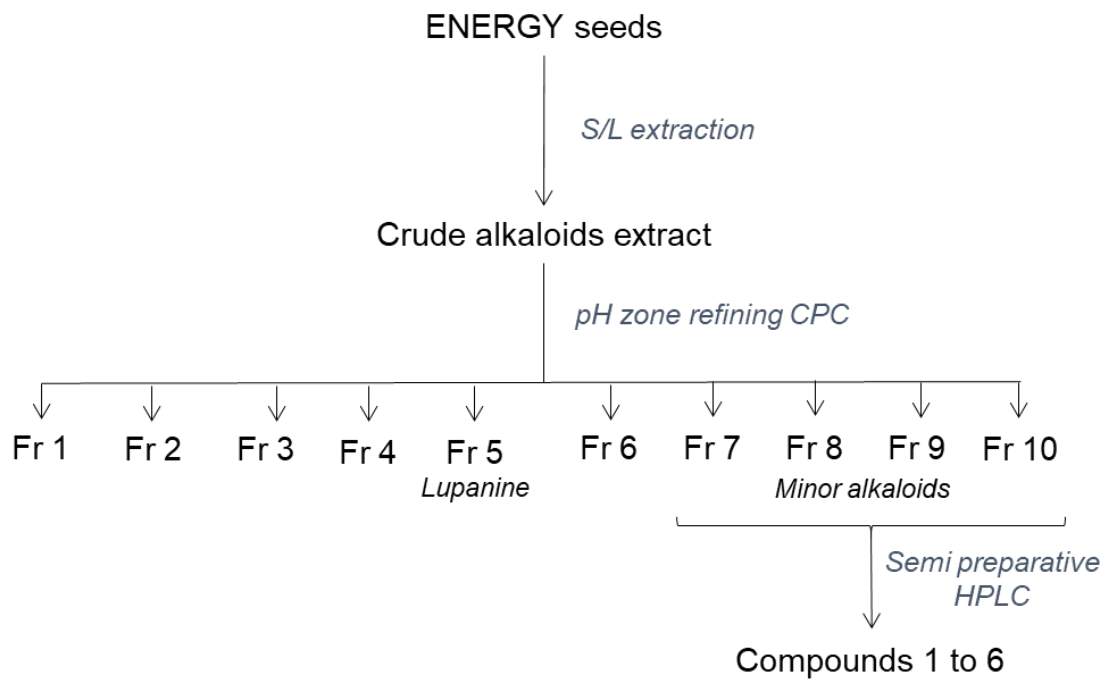

**Figure S2: Alkaloid extraction and identification scheme for the energy lupin variety**

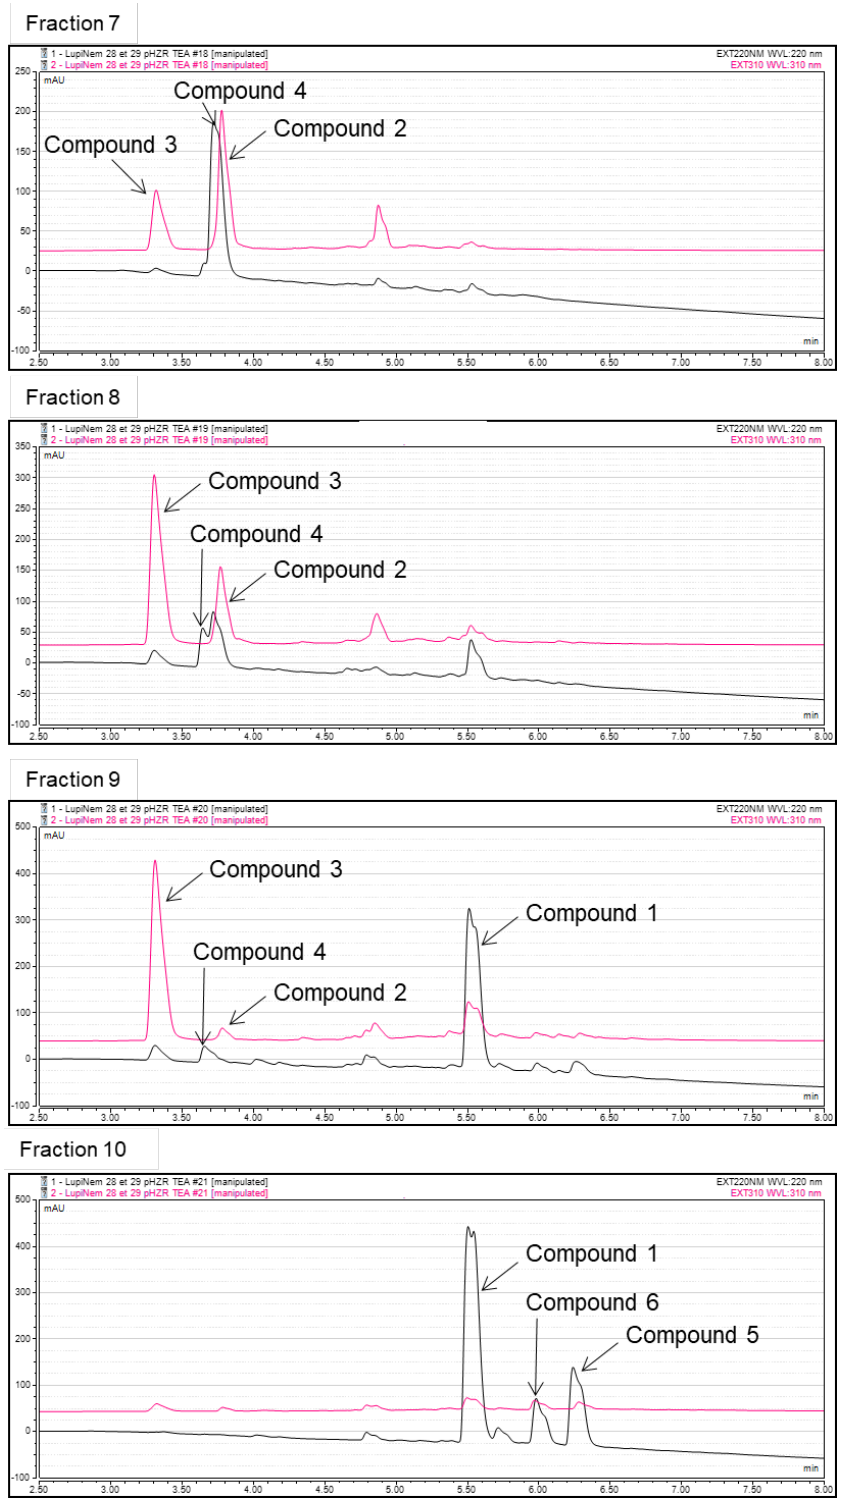

**Figure S3. HPLC Chromatogram of active alkaloids fractions obtained after CPC fractionation**

HPLC profile at 220 nm (black) and 310 nm (pink) of fractions 7 to 10 were represented here.

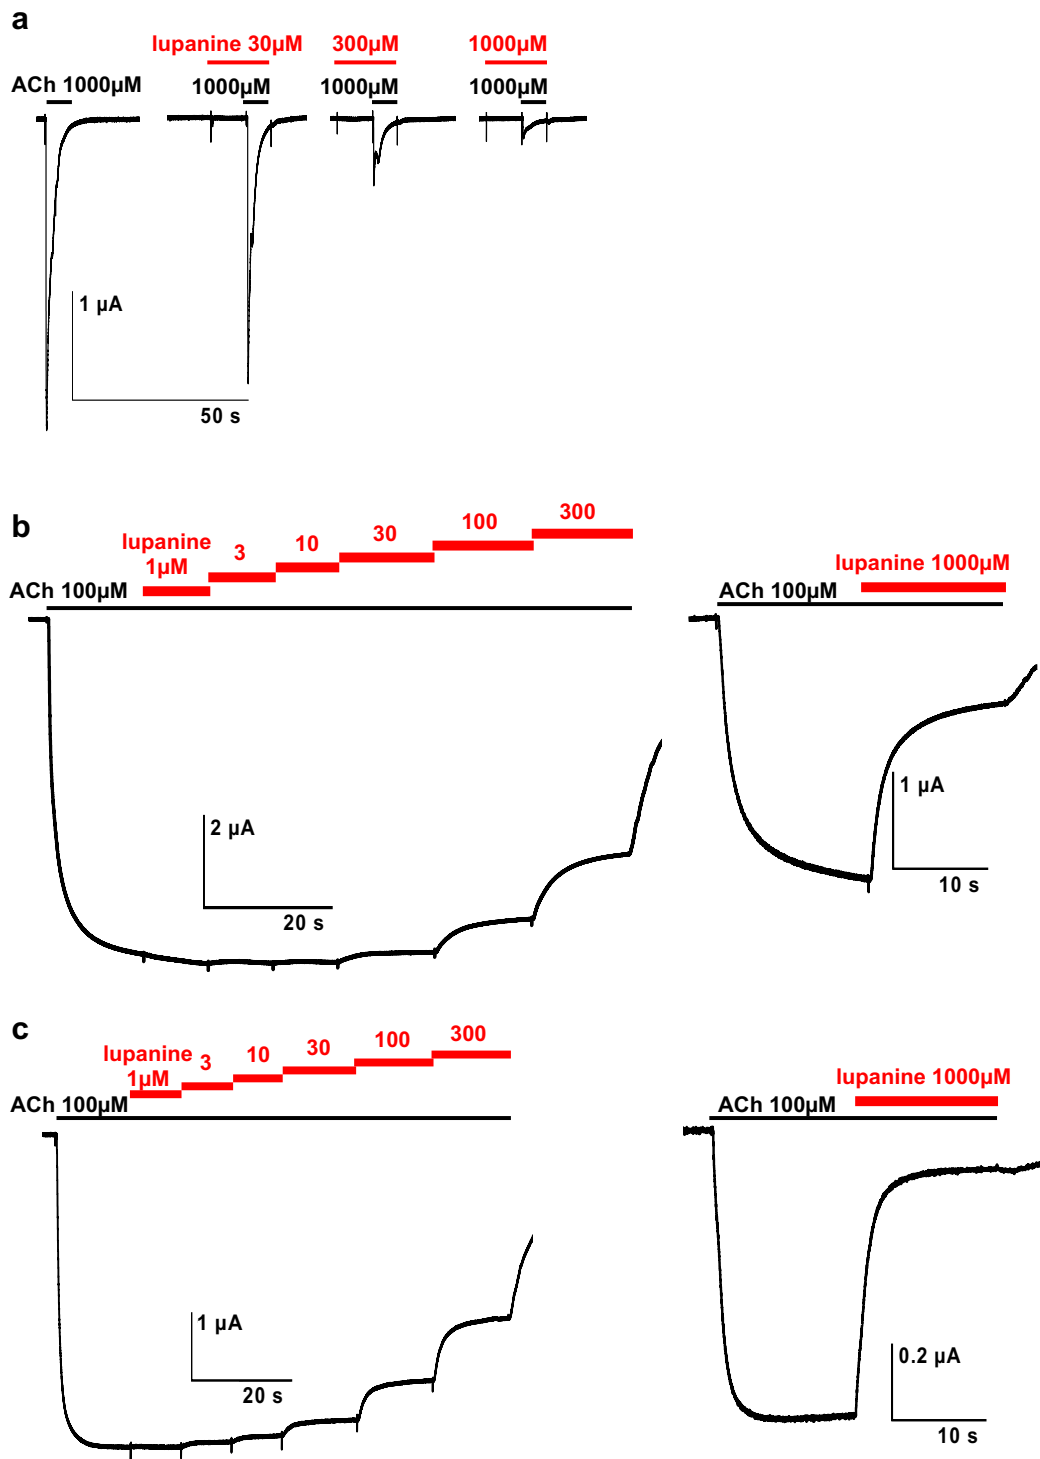

**Figure S4. Inhibitory effect of lupanine on recombinant acetylcholine receptors**

Representative recording traces of ACh response (black bar) in the presence of increasing concentrations of lupanine (red bars) on the *C. elegans* N-AChR (a) and L-AChR (b) and the *H. contortus* Hco-L-AChR-1 (c) are plotted.
